# Supplementary material for: Whole genome sequencing and microsatellite analysis of the Plasmodium falciparum E5 NF54 strain show that the var, rifin and stevor gene families follow Mendelian inheritance
Source: Springer Nature journal article supplement (doi:10.1186/s12936-018-2503-2), 2018-10-22

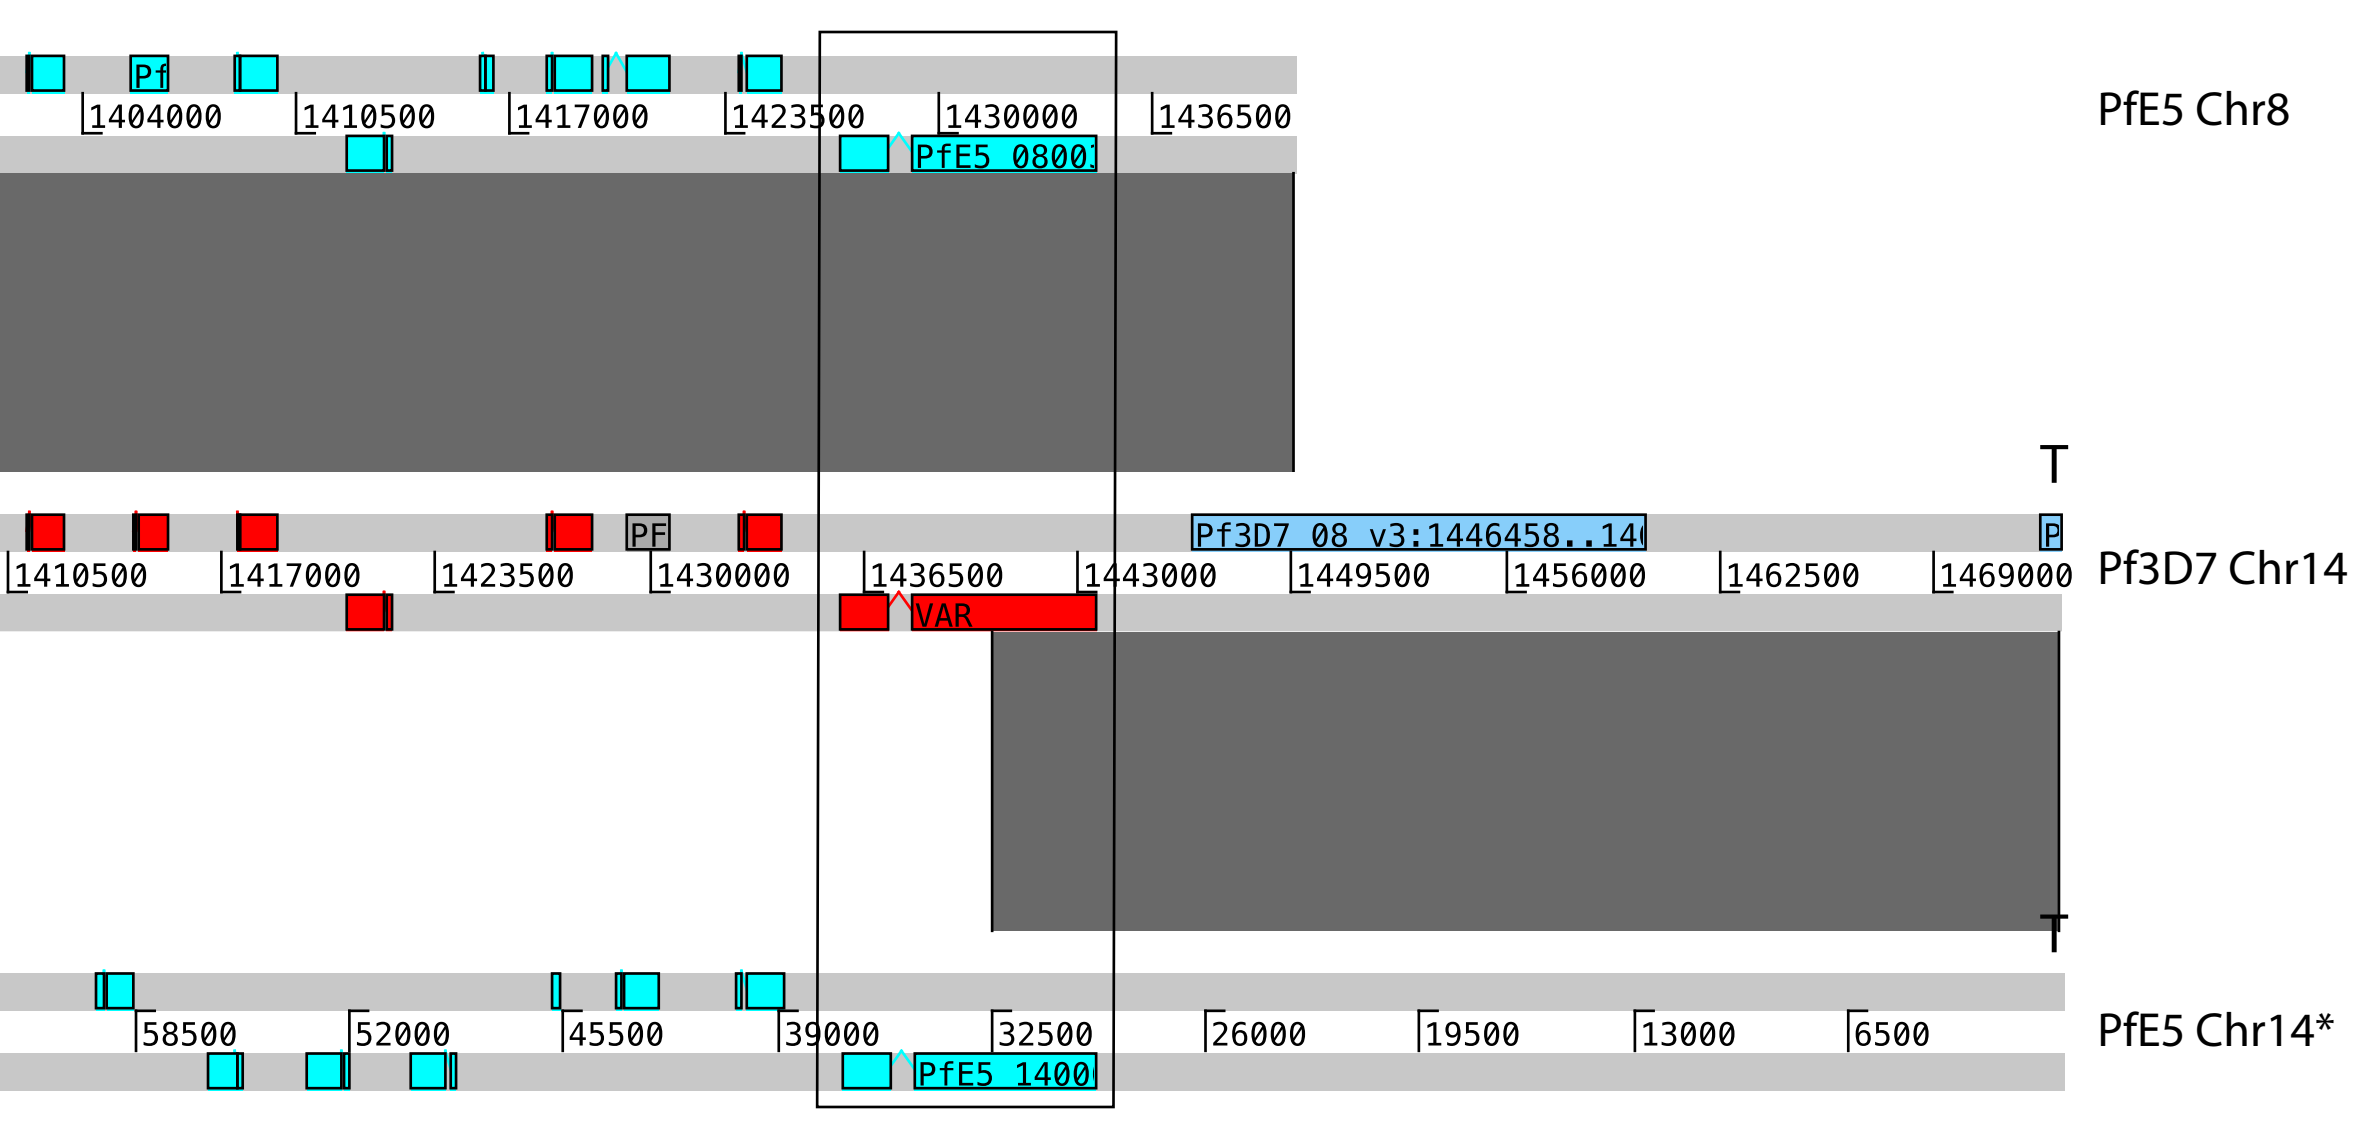

Supplement: MOESM4 [file 16217378]
